# Effect of reversible osmotic stress on live cell plasma membranes, probed via Laurdan general polarization measurements

Elmer Zapata-Mercado and Kalina Hristova \*

*Department of Materials Science and Engineering, Institute for NanoBioTechnology, and Program in Molecular Biophysics, Johns Hopkins University, Baltimore, MD 21218*

[\\*kh@jhu.edu](mailto:kh@jhu.edu), 410-516-8939

## Abstract

Here we seek to gain insight into changes in the plasma membrane of live cells upon the application of osmotic stress using Laurdan, a fluorescent probe that reports on membrane organization, hydration, and dynamics. It is known that the application of osmotic stress to lipid vesicles causes a decrease in Laurdan's generalized polarization (GP), which has been interpreted as an indication of membrane stretching. In cells, we see the opposite effects, as GP increases when the osmolarity of the solution is decreased. This increase in GP is associated with the presence of caveolae, which are known to disassemble and flatten in response to osmotic stress, in a process that supplies extra plasma membrane in physiological processes.

## Significance

Cells can experience multiple stresses *in vivo*. Furthermore, the application of osmotic stress is used as a biophysical tool to interrogate membrane processes *in vitro*. We sought to investigate the consequences of osmotic stress on the plasma membrane properties using the fluorescent probe Laurdan. Unexpectedly, we find that osmotic stress leads to an increase in GP in live cells. The opposite change in GP has been observed in model lipid bilayers, reminding us there are limitations to the utility of model systems in understanding cell membrane behavior. Despite years of research, the cell membrane still has ways to surprise us.

## Introduction

The plasma membrane consists of a phospholipid bilayer with embedded proteins that mediate the communication with the external environment and control the transportation of nutrients and ions. The lipid bilayer is the structural backbone of the cellular membrane. For many years, it was believed to just provide a passive physical barrier to non-specific, non-protein mediated passage of molecules (1). However, recent research has revealed that the lipid components can play an active role in cell physiology (2,3). It is now appreciated that the phospholipid bilayer is highly complex and dynamic, and plays regulatory roles in many physiological processes such as cell signaling, synaptic neurotransmission, and metabolism.

Remarkably, cells possess two to three times the membrane needed to sustain their shape (4,5). This extra membrane is primarily stored in the caveolae, 60-80 nm cup-shaped invaginations (6,7). The caveolae were first observed in electron microscopy experiments as pits with flask-shaped morphology and uniform curvature. These structures play an essential role in the cellular response to acute mechanical stress as they disassemble and flatten in a rapid process independent of ATP or actin (8). Thus, caveolae serve as a membrane reservoir to protect the cell (8). This role is of great physiological significance since cells can experience multiple stresses *in vivo*. For example, epithelial cells in our lungs are exposed to cycles of mechanical stress when we breathe, endothelial cells are constantly exposed to shear flow, and myocytes endure stress and strain regularly when muscles contract and relax (9-12).

Here we investigate if the physical-chemical properties of the plasma membrane are altered upon the application of osmotic stress. We monitor changes in the membrane environment using Laurdan, a fluorescent probe that has been used for years to study lipid organization and dynamics in synthetic and biological membranes (13-39). Laurdan is an amphipathic fluorophore that incorporates into lipid bilayers and biological membranes. It is polarity-sensitive and has been used previously to monitor changes in

membrane bending, tension, and/or domain formation. When excited, Laurdan undergoes charge separation, creating a strong dipole. The coupling between the Laurdan dipole and the dipoles of nearby water molecules in the membrane results in a redshift in the Laurdan emission spectrum. This hydration-induced redshift can be assessed by quantifying a single parameter, the so-called Generalized Polarization (GP) (27,35,37). The value of GP decreases as Laurdan is exposed to an increasingly polar environment and increases as the environment becomes less polar. Thus, Laurdan has been used to study the hydration of membranes. However, recent work has expanded the understanding of the Laurdan fluorescence response (40-43). It has been pointed out that free water molecules are sparse in lipid bilayers. Instead, the water molecules are tightly bound to lipid carbonyls and thus the mobility of the lipids, along with the bound water, can also affect the fluorescence properties of Laurdan. Specifically, the GP of Laurdan has been shown to increase with decreased lipid mobility and to decrease as the lipid mobility is increased (40-43).

Laurdan fluorescence has been used previously in the context of lipid vesicles that have been subjected to osmotic stress (44). In particular, a decrease in GP has been reported as a function of osmotic stress (44). These observations were interpreted as a proof for increased membrane tension and membrane stretching, which allows water molecules to enter the hydrophobic interior of the membrane. In this work, we sought to determine if similar effects are observed in the plasma membranes of live cells in response to osmotic stress.

## **Experimental Methods**

### *Cell Culture*

Experiments were performed in Chinese Hamster Ovary (CHO) and Mouse Embryonic Fibroblast (MEF) cells. The MEFs included a (+/+) version that is homozygous for the caveolin-1 gene (or wild-type) and a (-/-) knock-out.

The cells were cultured in Dulbecco's modified Eagle medium (DMEM), supplemented with 10% fetal bovine serum (ThermoFisher), 1.8 g/L d-glucose, 1.5g/L sodium bicarbonate, and 1mM non-essential amino acids (NEEA) for the CHO cells media. Cells

were seeded in 35-mm glass-bottom collagen-coated dishes (MakTek's Corporation) at a density of  $2.0 \times 10^4$ . Cells were kept in an incubator at 37°C with 5% carbon dioxide.

To apply the osmotic stress, cells were incubated with a hypotonic solution (swelling media) buffered with 25mM HEPES, prepared with serum-free DMEM media (starvation media), and increasing amounts of diH<sub>2</sub>O. These different solutions contained 0, 10, 25, 40, 45, 50, 60, 65, 75, 90, 95, and 100% diH<sub>2</sub>O. Twenty-four hours after seeding, Laurdan from a methanol stock was pre-mixed with 1mL of starvation media to a concentration of 10μM. The cells were incubated with the Laurdan solution for 15 mins at 37°C and then washed with 1x PBS to remove the excess Laurdan. The swelling media was added to the cells at the pre-set imaging temperature at least 5mins before imaging. The temperature was adjusted using a Stable Z stage (Bioptechs).

### *Vesicles*

CHO cells were seeded into a six-well plate at a density of  $5 \times 10^4$ , as described in (45). Twenty-four hours after seeding, cells were vesiculated as previously described (46). Briefly, cells were first rinsed three times with 1x PBS supplemented with 750μM calcium and 500μM magnesium (CM-PBS). Then the cells were incubated with 10μM Laurdan pre-mixed with the vesiculation buffer for 1 hour at 37°C. This buffer consisted of CM-PBS with 25mM formaldehyde and 0.5 mM 1,4-dithiothreitol (DTT). The formaldehyde was quenched with glycine with a final concentration of 125mM. Vesicles were transferred to a four-well glass-bottom imaging slide (MakTek) and let to settle down for 1 hour prior to imaging.

### *Laurdan Spectra Acquisition and Analysis*

Laurdan spectra were acquired with a two-photon microscope equipped with the OptiMis spectral imaging system (Aurora Spectral Technologies)(47). Laurdan was excited at 780 nm with a femtosecond Mai-Tai laser (Spectra-Physics). The system allows the acquisition of full spectra for each pixel in the frame, and it records the emission in a stack of 200 images at different wavelengths, approximately ~1nm apart. To extract the Laurdan spectra, the image stacks were analyzed using the software ImageJ to plot the

emission spectra in the selected membrane region of interest, as shown in Figure 1. The generalized fluorescence of Laurdan was calculated according to:

$$GP = \frac{(I_{430} - I_{490})}{(I_{430} + I_{490})} \quad \text{Eqn. 1}$$

where  $I_{430}$  is the integrated spectral intensity in a 20nm window centered at 430nm and  $I_{490}$  is the integrated spectral intensity in a 20nm window centered at 490nm.

Cells (or vesicles), under all conditions studied, were imaged in at least three independent experiments. Each data set was derived from at least 20 (typically 40 to 50) individual cells or vesicles. One or two regions of plasma membrane were analyzed per cell (as shown in Figure 1A). These regions were selected randomly, from membrane areas that were in focus, and not in contact with intracellular organelles or neighboring cells.

### *Statistical Analysis*

The statistical analysis was based on one-way ANOVA using GraphPad Prism 8.3.

### *Osmolarity measurements*

Measurements were performed in the Johns Hopkins Hospital Core lab using an automated A2O osmometer (Advanced Instruments).

## **Results**

Here we sought to understand how the application of osmotic stress changes the plasma membrane environment. Towards this goal, we used Laurdan as a membrane probe, as its emission spectrum depends on the environment. In the experiments, 10 $\mu$ M Laurdan was added to CHO cells and incubated for 15 minutes. Cells were washed and subjected to reversible osmotic stress in serum-free media with increasing amounts of diH<sub>2</sub>O. After 5 minutes, the emission spectra of Laurdan in CHO plasma membranes were acquired as described in Methods. From these spectra, the general polarization (GP) of Laurdan was calculated using **Equation 1**.

Integrated fluorescence images of cells at different media dilutions are shown in **Figure 2A**. The osmolarities of the media dilutions are shown in **Figure 2B**. Typical Laurdan spectra are shown in **Figure 3A**, for the cases of 0% and 90% media dilution with diH<sub>2</sub>O. In a standard medium (0% diH<sub>2</sub>O), we observe an emission maximum at ~430 nm and a second less pronounced peak at ~490 nm. The application of osmotic stress at 90% diH<sub>2</sub>O decreases the 490 nm peak. In **Figure 3B**, the Laurdan GP was calculated for all experimental conditions investigated. As diH<sub>2</sub>O in the swelling media increases, the GP stays constant up to 60% diH<sub>2</sub>O and increases afterward up to 95% diH<sub>2</sub>O. Imaging at 100% diH<sub>2</sub>O revealed a marked decrease in GP, likely indicating water penetration in the membrane. With time, many of the cells in 100% diH<sub>2</sub>O could not withstand the osmotic pressure, and their membranes ruptured.

Our finding that the application of osmotic stress increases GP, while the opposite was observed in lipid bilayers, was surprising. To gain confidence in our results, we performed control experiments where we increased the temperature without swelling the cells. The Laurdan spectra at room temperature (RT), 37°C, and 42°C are shown in **Figure 4A** and reveal that the amplitude of the 490nm peak increases with temperature. The calculated GP is presented in **Figure 4B** and decreases when the temperature increases. These results are consistent with the literature, as it is accepted that the increase in temperature increases its water penetration as it disorders the membrane (48,49). Thus, we find that the temperature and the application of osmotic stress have opposite effects. Furthermore, a decrease in GP was observed when the temperature was increased even in cells under reversible osmotic stress (**Figure 4C, 4D**).

The application of osmotic stress has been linked to the flattening of the caveolae (8). We therefore hypothesized that our observations are intimately linked with caveolae, and thus GP would not increase if there were no caveolae. To test this hypothesis, we used Mouse Embryonic Fibroblasts (3T3 MEFs) that do not express caveolin1 and thus do not have caveolae (3T3 MEFs (-/-)). As a control, we also used the normal 3T3 MEF (+/+). Typical Laurdan spectra for the two cell lines are shown in **Figure 5A** and **5B**, for the cases of 0% and 90% media dilution with diH<sub>2</sub>O. We found that the GP measured for 3T3 MEFs (+/+) is increased upon the application of reversible osmotic stress, similar to the

results observed in CHO cells. On the other hand, the GP for 3T3 MEF (-/-) was the same in the presence and absence of osmotic stress. Furthermore, the GP values measured in 3T3 MEF (-/-) cells lacking caveolae were different from the GP value for 3T3 MEF (+/+) cells at 0% diH<sub>2</sub>O, but indistinguishable from the 3T3 MEF (+/+), 0% diH<sub>2</sub>O GP value. These results show that the cell membrane lacking caveolae is similar to normal cell membranes under reversible osmotic stress but has higher GP values when compared to normal cell membranes in regular cell media. These data are thus consistent with our hypothesis that the GF increase is a consequence of the flattening of the caveolae or the “un-wrinkling” of the membrane.

A cell under reversible osmotic stress has a topology that resembles a giant plasma membrane-derived vesicle (50). Such vesicles are produced by cells in response to the so-called vesiculation buffers and are increasingly being used in biophysical research (51-53). We used Laurdan as a probe to compare the membrane environment of cells under reversible osmotic stress and vesicles produced with the widely used formaldehyde method. The results are shown in **Figure 6**. They demonstrate that there are no statistically significant differences between GP values of swollen cells and plasma membrane vesicles, suggesting that they have a similar membrane environment.

## Discussion

The main finding in this paper is that Laurdan’s GP, measured in the plasma membrane, increases upon the application of reversible osmotic stress. This increase in GP occurs only at high osmotic stress once the cell media is diluted by 50% or more with diH<sub>2</sub>O. The effect is opposite to what is observed upon increase in temperature. Furthermore, the effect of osmotic stress is different in the plasma membranes of live cells and in lipid vesicles which are often used as models of the plasma membrane. The GP has been found to decrease in lipid vesicles in response to osmotic stress (44), and this decrease was interpreted as an indication of bilayer stretching, which leads to an increase in water penetration (44).

In the laboratory, researchers use reversible osmotic stress to flatten the caveolae and thus “un-wrinkle” the plasma membranes in a reversible manner, such that the membrane topology is known in biophysical experiments (54,55). Indeed, in fluorescence microscopy

experiments, the application of osmotic stress results in spherical plasma membrane topology, where the membrane is perpendicular to the imaging plane. In this case, the two-dimensional concentration of fluorophores in the plasma membrane can be calculated from the effective 3D concentrations through a multiplication by the pixel length. The application of reversible osmotic stress to cells is non-lethal and is fully reversible (8,50,55,56). Indeed, we have shown that once the swelling medium is replaced with starvation medium, and the cells are placed back in the incubator, they recover fully, consistent with other reports of complete reversibility (34). Furthermore, the FRET efficiencies measured for membrane proteins are not affected by the application of reversible osmotic stress (56), suggesting that the interactions are very similar in unperturbed cells and in cells under reversible osmotic stress. However, a concern may arise that the lipid membrane is stretched due to the application of osmotic stress. This concern motivated the current study. In our cellular study, a decrease in GP was observed only at the highest osmotic stress when the diH<sub>2</sub>O content was increased above 95%. Under these conditions, the plasma membranes often ruptured during the imaging session, indicating that pressures leading to membrane stretching were not well tolerated by cells. However, we found that cells could easily withstand media dilution up to 90% with no indications for membrane stretching.

How can we explain the GP increase upon the application of osmotic stress? One possibility is that it is a direct consequence of hydration changes in the caveolae. In particular, the necks of the caveolae are sites of very high curvatures, imposed by the organizing proteins. It is possible that these regions are highly strained and hydrated, and the lipids are highly disordered. It could be speculated that the application of osmotic stress leads to highly localized changes in the necks of the caveolae that expel water molecules. Since these areas are much smaller than the diffraction limit of light, we likely observe an average increase in the GP in the membrane. Another possibility is that the GP in our experiments reports mainly on changes in lipid mobility in the membrane upon the application of osmotic stress, with an increase in GP indicating decreased mobility. It is known that the lipid composition of caveolae is enriched in cholesterol and sphingolipids, and thus caveolae are regions of low lipid mobility (57-59). Upon caveolae disassembly, the prevalence of cholesterol and sphingolipids in these regions should



decrease. However, this effect cannot explain our observations as it would lead to an increase in GP, i.e., the opposite effect of what is observed. It is possible, however, that the dispersal of cholesterol and sphingolipids from the caveolae into the membrane has a marked effect on lipid mobility which we measure here. Further, it should be noted that caveolae play a role in signaling (57), and thus downstream signaling effects may contribute to the observations reported here. Future studies are needed to fully understand all cellular events that contribute to the observed increase in GP.

GP is a phenomenological parameter, often used in membrane biophysics since steady-state Laurdan fluorescence is straightforward to measure. While the interpretation of GP may pose a challenge, the fact remains that the change in GP upon the application of osmotic stress is exactly the opposite in lipid vesicles and in cells. Thus, the behavior observed here in cells could not be predicted based on measurements in model systems.

Lipid bilayers have been an extraordinarily useful model system for understanding processes in cellular membranes. This study reminds us that measurements in this simple system cannot be expected to always mirror the response of the plasma membrane. Likewise, plasma membrane-derived vesicles are increasingly being used in biophysical research (51,60). Our results suggest that they represent a membrane environment with similar physical-chemical properties as the plasma membrane in cells under reversible osmotic stress, as well as in cells with no caveolae. It is also interesting that cells can easily withstand very high media dilution with no indications for membrane stretching. This work contributes to our understanding of membrane models and the limitations they impose, as we seek to understand processes in native plasma membranes using biophysical tools.

### **Acknowledgement.**

Supported by NSF MCB 1712740. We thank Dr. Anne K. Kenworthy for reading an early version of the manuscript, and for suggesting the 3T3 MEF (-/-) line as control. We thank Brandon Tenney, Maryann Ness, and Mark Marzinke from the Johns Hopkins Hospital Core Lab facility for the osmotic measurements.

1. Singer, S. J., and Nicolson, G. L. (1972) The fluid mosaic model of the structure of cell membranes. *Science* **175**, 720-731
2. Chan, R. B., Oliveira, T. G., Cortes, E. P., Honig, L. S., Duff, K. E., Small, S. A., Wenk, M. R., Shui, G. H., and Di Paolo, G. (2012) Comparative Lipidomic Analysis of Mouse and Human Brain with Alzheimer Disease. *Journal of Biological Chemistry* **287**, 2678-2688
3. Postila, P. A., and Rog, T. (2020) A Perspective: Active Role of Lipids in Neurotransmitter Dynamics. *Mol Neurobiol* **57**, 910-925
4. Parmryd, I., and Onfelt, B. (2013) Consequences of membrane topography. *FEBS.J.* **280**, 2775-2784
5. Adler, J., Shevchuk, A. I., Novak, P., Korchev, Y. E., and Parmryd, I. (2010) Plasma membrane topography and interpretation of single-particle tracks. *Nat.Methods* **7**, 170-171
6. Marx, J. (2001) Caveolae: A once-elusive structure gets some respect. *Science* **294**, 1862-1865
7. Anderson, R. G. W. (2001) The caveolae membrane system. *Annual Review of Biochemistry* **67**, 199-225
8. Sinha, B., Koster, D., Ruez, R., Gonnord, P., Bastiani, M., Abankwa, D., Stan, R. V., Butler-Browne, G., Védie, B., Johannes, L., Morone, N., Parton, R. G., Raposo, G., Sens, P., Lamaze, C., and Nassoy, P. (2011) Cells respond to mechanical stress by rapid disassembly of caveolae. *Cell*. **144**, 402-413
9. Boyd, N. L., Park, H., Yi, H., Boo, Y. C., Sorescu, G. P., Sykes, M., and Jo, H. (2003) Chronic shear induces caveolae formation and alters ERK and Akt responses in endothelial cells. *Am J Physiol Heart Circ Physiol* **285**, H1113-1122
10. Rizzo, V., Morton, C., DePaola, N., Schnitzer, J. E., and Davies, P. F. (2003) Recruitment of endothelial caveolae into mechanotransduction pathways by flow conditioning in vitro. *Am J Physiol Heart Circ Physiol* **285**, H1720-1729
11. Park, H., Go, Y. M., Darji, R., Choi, J. W., Lisanti, M. P., Maland, M. C., and Jo, H. (2000) Caveolin-1 regulates shear stress-dependent activation of extracellular signal-regulated kinase. *Am J Physiol Heart Circ Physiol* **278**, H1285-1293
12. Sedding, D. G., Seay, U., Fink, L., Heil, M., Kummer, W., Tillmanns, H., and Braun-Dullaeus, R. C. (2003) Mechanosensitive p27Kip1 regulation and cell cycle entry in vascular smooth muscle cells. *Circulation* **108**, 616-622
13. Gunther, G., Malacrida, L., Jameson, D. M., Gratton, E., and Sanchez, S. A. (2021) LAURDAN since Weber: The Quest for Visualizing Membrane Heterogeneity. *Acc Chem Res* **54**, 976-987
14. Castro-Castillo, V., Gajardo, J., Sandoval-Altamirano, C., Gratton, E., Sanchez, S., Malacrida, L., and Gunther, G. (2020) CAPRYDAA, an anthracene dye analog to LAURDAN: a comparative study using cuvette and microscopy. *J Mater Chem B* **8**, 88-99
15. Malacrida, L., and Gratton, E. (2018) LAURDAN fluorescence and phasor plots reveal the effects of a H<sub>2</sub>O<sub>2</sub> bolus in NIH-3T3 fibroblast membranes dynamics and hydration. *Free Radic Biol Med* **128**, 144-156

16. Malacrida, L., Jameson, D. M., and Gratton, E. (2017) A multidimensional phasor approach reveals LAURDAN photophysics in NIH-3T3 cell membranes. *Sci Rep* **7**, 9215
17. Malacrida, L., Astrada, S., Briva, A., Bollati-Fogolin, M., Gratton, E., and Bagatolli, L. A. (2016) Spectral phasor analysis of LAURDAN fluorescence in live A549 lung cells to study the hydration and time evolution of intracellular lamellar body-like structures. *Biochim Biophys Acta* **1858**, 2625-2635
18. Golfetto, O., Hinde, E., and Gratton, E. (2015) The Laurdan spectral phasor method to explore membrane micro-heterogeneity and lipid domains in live cells. *Methods Mol Biol* **1232**, 273-290
19. Bonaventura, G., Barcellona, M. L., Golfetto, O., Nourse, J. L., Flanagan, L. A., and Gratton, E. (2014) Laurdan monitors different lipids content in eukaryotic membrane during embryonic neural development. *Cell Biochem Biophys* **70**, 785-794
20. Golfetto, O., Hinde, E., and Gratton, E. (2013) Laurdan fluorescence lifetime discriminates cholesterol content from changes in fluidity in living cell membranes. *Biophys J* **104**, 1238-1247
21. Sanchez, S. A., Tricerri, M. A., and Gratton, E. (2012) Laurdan generalized polarization fluctuations measures membrane packing micro-heterogeneity in vivo. *Proc Natl Acad Sci U S A* **109**, 7314-7319
22. Vetri, V., Ossato, G., Militello, V., Digma, M. A., Leone, M., and Gratton, E. (2011) Fluctuation Methods To Study Protein Aggregation in Live Cells: Concanavalin A Oligomers Formation. *Biophysical Journal* **100**, 774-783
23. Sanchez, S. A., and Gratton, E. (2005) Lipid-protein interactions revealed by two-photon microscopy and fluorescence correlation spectroscopy. *Accounts of Chemical Research* **38**, 469-477
24. Bagatolli, L. A., Sanchez, S. A., Hazlett, T., and Gratton, E. (2003) Giant vesicles, Laurdan, and two-photon fluorescence microscopy: evidence of lipid lateral separation in bilayers. *Methods Enzymol* **360**, 481-500
25. Granjon, T., Vacheron, M. J., Vial, C., and Buchet, R. (2001) Mitochondrial creatine kinase binding to phospholipids decreases fluidity of membranes and promotes new lipid-induced structures as monitored by red edge excitation shift, Laurdan fluorescence, and FTIR. *Biochemistry* **40**, 6016-6026
26. Bagatolli, L. A., Gratton, E., and Fidelio, G. D. (1998) Water dynamics in glycosphingolipid aggregates studied by LAURDAN fluorescence. *Biophys J* **75**, 331-341
27. Parasassi, T., Gratton, E., Yu, W. M., Wilson, P., and Levi, M. (1997) Two-photon fluorescence microscopy of laurdan generalized polarization domains in model and natural membranes. *Biophys J* **72**, 2413-2429
28. Parasassi, T., and Gratton, E. (1995) Membrane lipid domains and dynamics as detected by Laurdan fluorescence. *J Fluoresc* **5**, 59-69
29. Parasassi, T., Di Stefano, M., Loiero, M., Ravagnan, G., and Gratton, E. (1994) Cholesterol modifies water concentration and dynamics in phospholipid bilayers: a fluorescence study using Laurdan probe. *Biophys J* **66**, 763-768
30. Kantar, A., Giorgi, P. L., Gratton, E., and Fiorini, R. (1994) Probing the Interaction of PAF with Human Platelet Membrane Using the Fluorescent Probe Laurdan. *Platelets* **5**, 145-148

31. Parasassi, T., Di Stefano, M., Loiero, M., Ravagnan, G., and Gratton, E. (1994) Influence of cholesterol on phospholipid bilayers phase domains as detected by Laurdan fluorescence. *Biophys J* **66**, 120-132
32. Fiorini, R., Curatola, G., Kantar, A., Giorgi, P. L., and Gratton, E. (1993) Use of Laurdan fluorescence in studying plasma membrane organization of polymorphonuclear leukocytes during the respiratory burst. *Photochem Photobiol* **57**, 438-441
33. Levi, M., Wilson, P. V., Cooper, O. J., and Gratton, E. (1993) Lipid phases in renal brush border membranes revealed by Laurdan fluorescence. *Photochem Photobiol* **57**, 420-425
34. Parasassi, T., Ravagnan, G., Rusch, R. M., and Gratton, E. (1993) Modulation and dynamics of phase properties in phospholipid mixtures detected by Laurdan fluorescence. *Photochem Photobiol* **57**, 403-410
35. Parasassi, T., Di Stefano, M., Ravagnan, G., Saporita, O., and Gratton, E. (1992) Membrane aging during cell growth ascertained by Laurdan generalized polarization. *Exp Cell Res* **202**, 432-439
36. Parasassi, T., and Gratton, E. (1992) Packing of phospholipid vesicles studied by oxygen quenching of Laurdan fluorescence. *J Fluoresc* **2**, 167-174
37. Parasassi, T., De Stasio, G., Ravagnan, G., Rusch, R. M., and Gratton, E. (1991) Quantitation of lipid phases in phospholipid vesicles by the generalized polarization of Laurdan fluorescence. *Biophys J* **60**, 179-189
38. Parasassi, T., De Stasio, G., d'Ubaldo, A., and Gratton, E. (1990) Phase fluctuation in phospholipid membranes revealed by Laurdan fluorescence. *Biophys J* **57**, 1179-1186
39. Parasassi, T., Conti, F., and Gratton, E. (1986) Time-resolved fluorescence emission spectra of Laurdan in phospholipid vesicles by multifrequency phase and modulation fluorometry. *Cell Mol Biol* **32**, 103-108
40. Amaro, M., Reina, F., Hof, M., Eggeling, C., and Sezgin, E. (2017) Laurdan and Di-4-ANEPPDHQ probe different properties of the membrane. *J Phys D Appl Phys* **50**, 134004
41. Pokorna, S., Jurkiewicz, P., Vazdar, M., Cwiklik, L., Jungwirth, P., and Hof, M. (2014) Does fluoride disrupt hydrogen bond network in cationic lipid bilayer? Time-dependent fluorescence shift of Laurdan and molecular dynamics simulations. *J Chem Phys* **141**, 22D516
42. Jurkiewicz, P., Cwiklik, L., Jungwirth, P., and Hof, M. (2012) Lipid hydration and mobility: an interplay between fluorescence solvent relaxation experiments and molecular dynamics simulations. *Biochimie* **94**, 26-32
43. Sachl, R., Stepanek, M., Prochazka, K., Humpolickova, J., and Hof, M. (2008) Fluorescence study of the solvation of fluorescent probes prodan and laurdan in poly(epsilon-caprolactone)-block-poly(ethylene oxide) vesicles in aqueous solutions with tetrahydrofuran. *Langmuir* **24**, 288-295
44. Boyd, M. A., and Kamat, N. P. (2018) Visualizing Tension and Growth in Model Membranes Using Optical Dyes. *Biophys J* **115**, 1307-1315
45. Del Piccolo, N., Placone, J., He, L., Agudelo, S. C., and Hristova, K. (2012) Production of plasma membrane vesicles with chloride salts and their utility as a cell membrane mimetic for biophysical characterization of membrane protein interactions. *Analytical Chemistry* **84**, 8650-8655

46. Scott, R. E., Perkins, R. G., Zschunke, M. A., Hoerl, B. J., and Maercklein, P. B. (1979) Plasma-Membrane Vesiculation in 3T3-Cells and Sv3T3-Cells .1. Morphological and Biochemical Characterization. *Journal of Cell Science* **35**, 229-243
47. Biener, G., Stoneman, M. R., Acbas, G., Holz, J. D., Orlova, M., Komarova, L., Kuchin, S., and Raicu, V. (2014) Development and Experimental Testing of an Optical Micro-Spectroscopic Technique Incorporating True Line-Scan Excitation. *International Journal of Molecular Sciences* **15**, 261-276
48. White, S. H., Wimley, W. C., Ladokhin, A. S., and Hristova, K. (1998) Protein folding in membranes: Pondering the nature of the bilayer milieu. *Biol.Skr.Dan.Selsk.* **49**, 91-98
49. Sun, W. J., Tristram-Nagle, S., Suter, R. M., and Nagle, J. F. (1996) Structure of gel phase saturated lecithin bilayers: Temperature and chain length dependence. *Biophysical Journal* **71**, 885-891
50. Singh, D. R., Cao, Q., King, C., Salotto, M., Ahmed, F., Zhou, X. Y., Pasquale, E. B., and Hristova, K. (2015) Unliganded EphA3 dimerization promoted by the SAM domain. *Biochemical Journal* **471**, 101-109
51. Levental, I., Grzybek, M., and Simons, K. (2011) Raft domains of variable properties and compositions in plasma membrane vesicles. *Proceedings of the National Academy of Sciences of the United States of America* **108**, 11411-11416
52. Levental, I., Lingwood, D., Grzybek, M., Coskun, U., and Simons, K. (2010) Palmitoylation regulates raft affinity for the majority of integral raft proteins. *Proceedings of the National Academy of Sciences of the United States of America* **107**, 22050-22054
53. Veatch, S. L., Cicuta, P., Sengupta, P., Honerkamp-Smith, A., Holowka, D., and Baird, B. (2008) Critical fluctuations in plasma membrane vesicles. *Acs Chemical Biology* **3**, 287-293
54. King, C., Stoneman, M., Raicu, V., and Hristova, K. (2016) Fully quantified spectral imaging reveals in vivo membrane protein interactions. *Integr.Biol.(Camb.)* **8**, 216-229
55. Singh, D. R., Ahmed, F., King, C., Gupta, N., Salotto, M., Pasquale, E. B., and Hristova, K. (2015) EphA2 Receptor Unliganded Dimers Suppress EphA2 Pro-tumorigenic Signaling. *Journal of Biological Chemistry* **290**, 27271-27279
56. Singh, D. R., Ahmed, F., Sarabipour, S., and Hristova, K. (2017) Intracellular Domain Contacts Contribute to Ecadherin Constitutive Dimerization in the Plasma Membrane. *J Mol Biol* **429**, 2231-2245
57. Parton, R. G., and Simons, K. (2007) The multiple faces of caveolae. *Nat Rev Mol Cell Biol* **8**, 185-194
58. Pike, L. J., Han, X. L., and Gross, R. W. (2005) Epidermal growth factor receptors are localized to lipid rafts that contain a balance of inner and outer leaflet lipids - A shotgun lipidomics study. *Journal of Biological Chemistry* **280**, 26796-26804
59. Pike, L. J. (2005) Growth factor receptors, lipid rafts and caveolae: An evolving story. *Biochimica et Biophysica Acta-Molecular Cell Research* **1746**, 260-273
60. Baumgart, T., Hammond, A. T., Sengupta, P., Hess, S. T., Holowka, D. A., Baird, B. A., and Webb, W. W. (2007) Large-scale fluid/fluid phase separation of proteins and lipids in giant plasma membrane vesicles. *Proceedings of the National Academy of Sciences of the United States of America* **104**, 3165-3170

## Figures

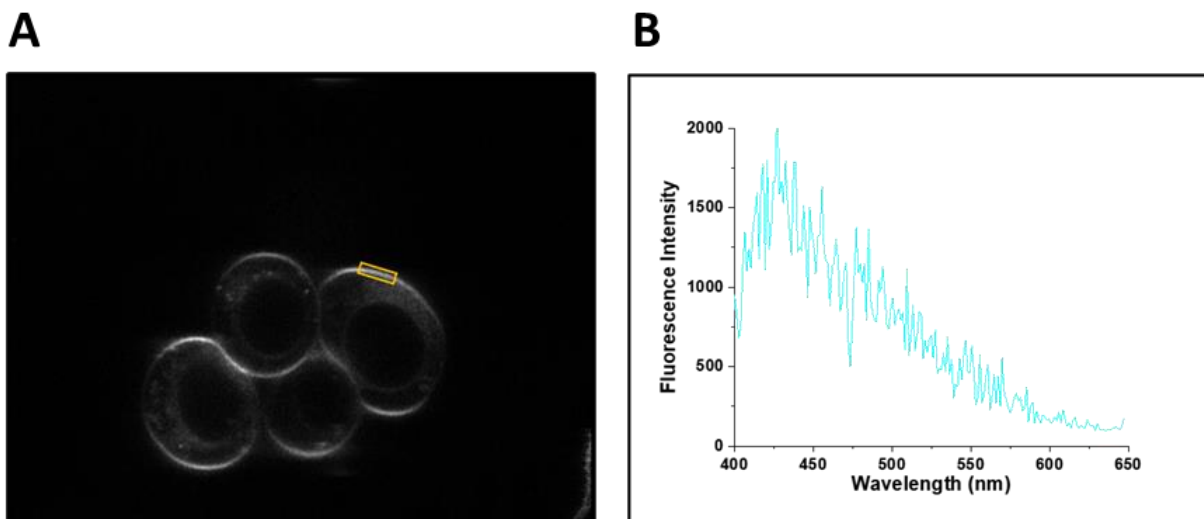

**Figure 1:** (A) CHO cells at 90% media dilution with diH<sub>2</sub>O. A region of interest from each cell (yellow) is analyzed and the average Laurdan spectrum is calculated and shown in **Figure 3A**. (B) Laurdan spectrum from a single pixel within the yellow region.

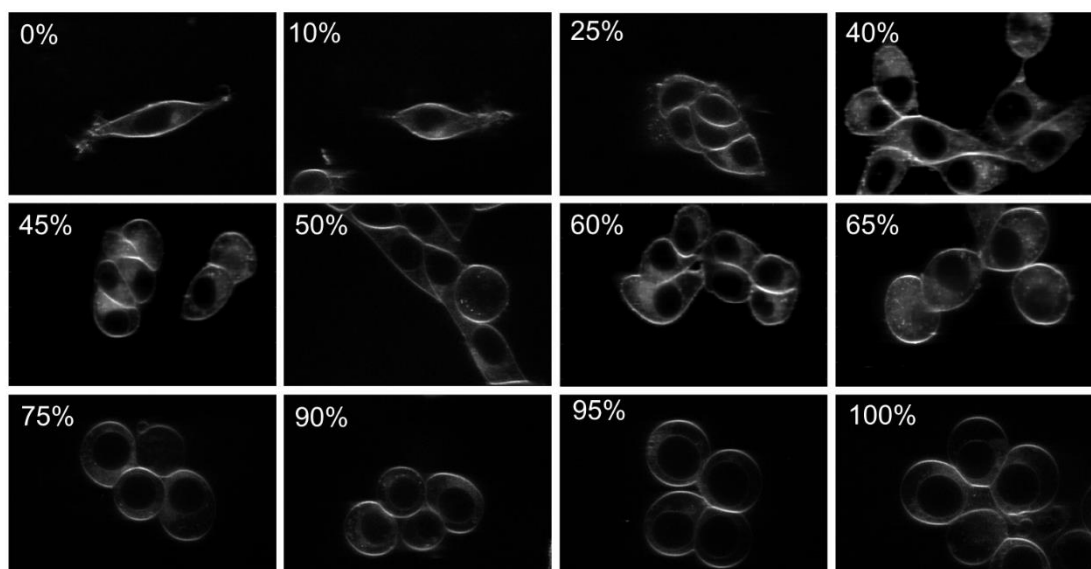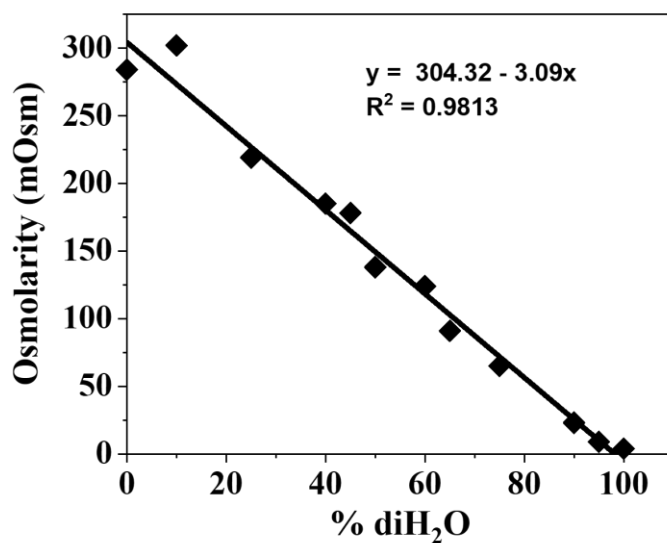

**Figure 2:** (A) Integrated fluorescence images of cells labeled with Laurdan, at different media dilutions with diH<sub>2</sub>O. (B) Osmolarity of the solutions as a function of diH<sub>2</sub>O content.

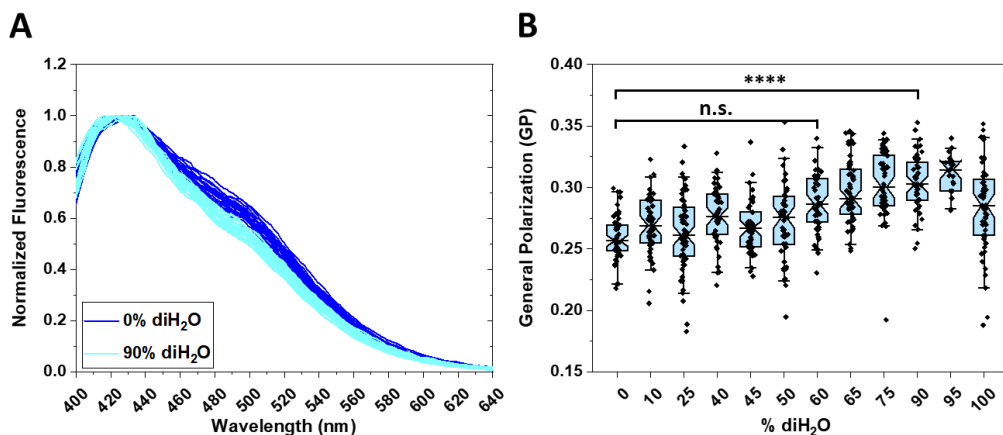

**Figure 3:** (A) Emission spectra of Laurdan in CHO cells at 0% and 90% media dilution. (B) Laurdan GP in CHO cells as a function of diH<sub>2</sub>O media dilution. GP was calculated using equation (1). The notched box line represents the mean; the top and bottom represent the 75<sup>th</sup> and 25<sup>th</sup> percentiles, respectively, and the bars represent the standard deviations.



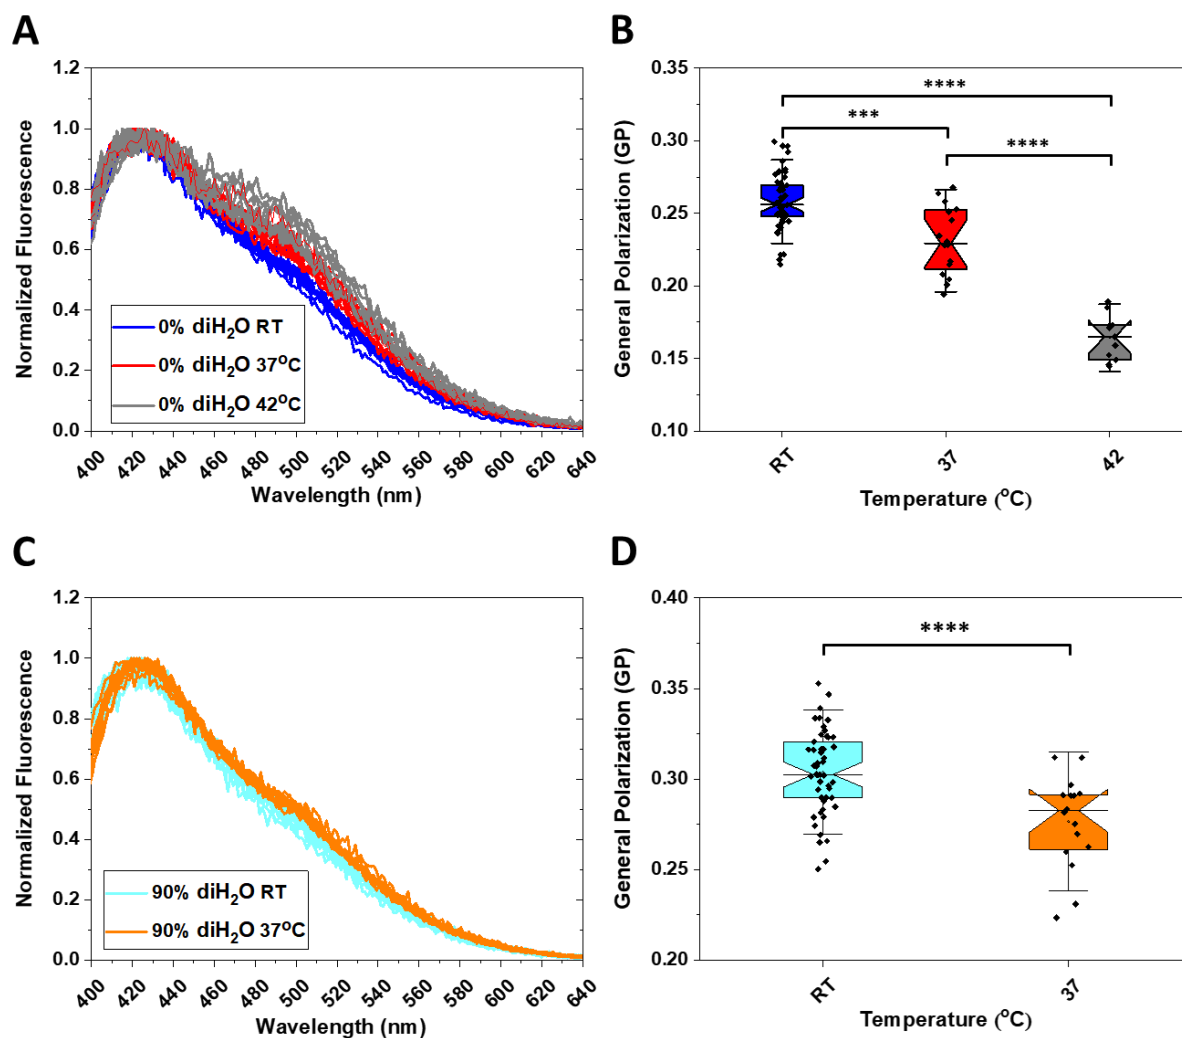

**Figure 4:** (A) Emission spectra of Laurdan in CHO cells in normal media, as a function of temperature; RT in blue, 37°C in red, and 42°C in dark grey. (B) Laurdan GP as a function of temperature in CHO cells. (C) Emission spectra in CHO cells at 90% media dilution, as a function of temperature; RT in cyan, 37° in orange. (D) Laurdan GP as a function of temperature at 90% media dilution. The notched box line represents the mean; the top and bottom represent the 75<sup>th</sup> and 25<sup>th</sup> percentiles, respectively, and the bars represent the standard deviations.

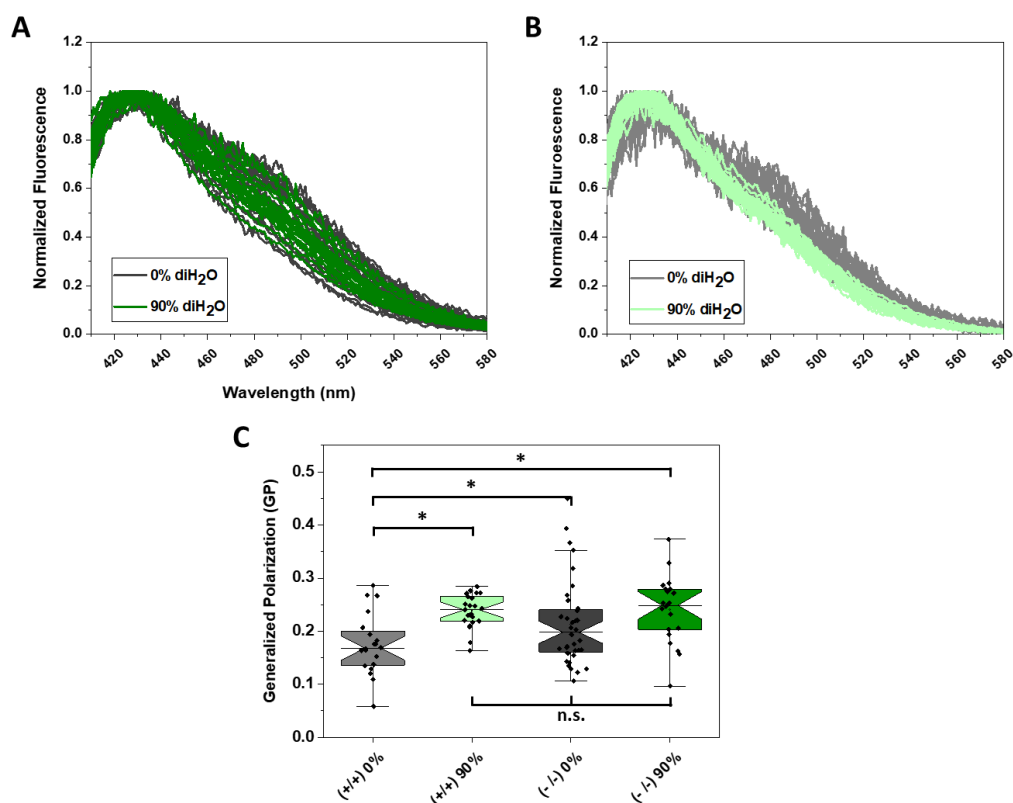

**Figure 5:** (A) Emission spectra of Laurdan in MEF (-/-) cells at 0% media dilution (dark grey) and 90% media dilution (dark green). (B) Emission spectra of Laurdan in MEF (+/+) cells at 0% media dilution (light grey) and 90% media dilution (mint green). (C) Comparison of Laurdan's GP for MEF (+/+) and (-/-) cells at 0% media dilution and 90% media dilution. The notched box line represents the mean; the top and bottom represent the 75<sup>th</sup> and 25<sup>th</sup> percentiles, respectively, and the bars represent the standard deviations.

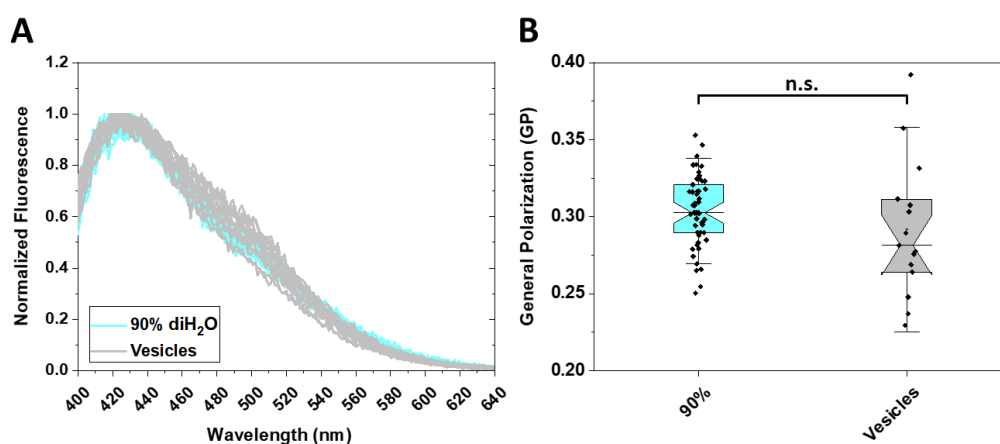

**Figure 6:** (A) Emission spectra of Laurdan in CHO cells at 90% media dilution (cyan) and in plasma membrane-derived vesicles (light grey). (B) Comparison of Laurdan GP for CHO cells at 90% media dilution and membrane-derived vesicles. The notched box line represents the mean; the top and bottom represent the 75<sup>th</sup> and 25<sup>th</sup> percentiles, respectively, and the bars represent the standard deviations.
